# Supplementary material for: (Ga1−xAlx)4B2O9: controlled surface acid–base properties and catalytic behavior towards the Strecker reaction
Source: Royal Society of Chemistry journal article supplement (doi:10.1039/d4dt01599a), 2024-01-01
Supplement: d4dt01599a1.pdf [file d4dt01599a1.pdf]

## Supporting information for

### **Ga<sub>1-x</sub>Al<sub>x</sub>)<sub>4</sub>B<sub>2</sub>O<sub>9</sub>-The controlled surface acid-base properties, and the catalytic behavior towards Strecker reaction**

Weilu Wang<sup>a\*</sup>, Zhong Fan<sup>a</sup>, Shiji Tang<sup>a</sup>, Ke Xu<sup>b</sup>, Binbin Luo<sup>c\*</sup>, Steven L. Suib<sup>d</sup>

<sup>a</sup> Dr. Weilu Wang, Zhong Fan, Shiji Tang, Yun Wu.

Engineering Research Center for Waste Oil Recovery Technology and Equipment,  
Ministry of Education, Chongqing Technology and Business University, Chongqing,  
400067, People's Republic of China.

E-mail: weiluwang@ctbu.edu.cn

<sup>b</sup> Dr. Ke Xu

Center for Photonics Information and Energy Materials, Shenzhen Institute of  
Advanced Technology, Chinese Academy of Sciences, Shenzhen 518055, P. R. China.

<sup>c</sup> Prof. Binbin Luo

Department of Chemistry and Chemical Engineering, Key Laboratory for Preparation  
and Application of Ordered Structural Materials of Guangdong Province, Shantou  
University, Shantou, 515063, P. R. China.

E-mail: bbluo1989@gmail.com

<sup>d</sup> Prof. Steven L. Suib

Department of Chemistry, University of Connecticut, Storrs, CT, 06269, United  
States.

## 1. Synthesis procedure for six substrates:

All the solvents were purified by distillation method. Other reagents were used as received. Thin layer chromatography (TLC) was carried out using Merck 0.2 mm silica gel 60 F-254 Al-plates (200-300 mesh). Taking 4-methyl-*N*-phenylmethylene-benzenesulfonamide as an example, 4-methylbenzenesulfonamide (12 mmol) was added to a mixture of benzaldehyde (10 mmol) and TOL (25 mL) in a 50 mL flask. After refluxing for 1 h,  $\text{BF}_3\text{OET}_2$  (2 mmol) was added into the reaction mixture. The reaction solution should be quenched with NaOH solution (1 M) and extracted with ethyl acetate for three times when the reaction ends (monitored by TLC). By washing with brine, drying over anhydrous  $\text{Na}_2\text{SO}_4$ , then concentrating under reduced atmosphere, the primary product was obtained. In some cases, this primary product was purified using flash column chromatography to afford pure product.

If using 2,4,6-Trimethylbenzaldehyde, 3,4-Dimethylbenzaldehyde, 4-Methylbenzaldehyde, 2-Naphthaldehyde, and 3-Phenoxybenzaldehyde, as the starting materials, the corresponding substrates are noted as **1b**, **1c**, **1d**, **1e**, and **1f**.

### Scheme S1. Procedure for the synthesis of six imines precursors<sup>a</sup>

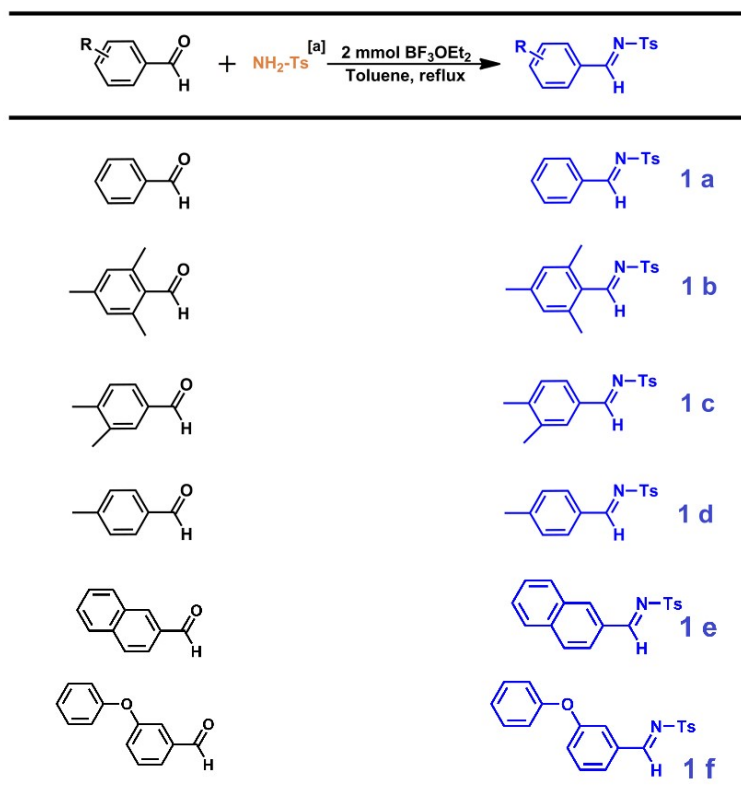

<sup>a</sup>Ts = *p*-toluenesulfonyl

## 2. <sup>1</sup>H NMR spectra of six imine substrates and six products

**1 a** <sup>1</sup>H NMR (600 MHz, DMSO-*d*<sub>6</sub>) δ 9.15 (s, 1H), 8.03 (d, *J* = 7.4 Hz, 2H), 7.85 (d, *J* = 8.1 Hz, 2H), 7.72 (t, *J* = 7.4 Hz, 1H), 7.58 (t, *J* = 7.7 Hz, 2H), 7.47 (d, *J* = 7.9 Hz, 2H), 2.41 (s, 3H).

**1 b** <sup>1</sup>H NMR (400 MHz, DMSO-*d*<sub>6</sub>) δ 9.31 (s, 1H), 7.84 (d, *J* = 8.3 Hz, 2H), 7.44 (d, *J* = 8.0 Hz, 2H), 6.99 (s, 2H), 2.42 (s, 6H), 2.39 (s, 3H), 2.26 (s, 3H).

**1 c** <sup>1</sup>H NMR (400 MHz, DMSO-*d*<sub>6</sub>) δ 9.04 (s, 1H), 7.83 (d, *J* = 8.0 Hz, 2H), 7.76 (s, 1H), 7.74 (d, *J* = 7.8 Hz, 1H), 7.43 (d, *J* = 8.0 Hz, 2H), 7.31 (d, *J* = 7.8 Hz, 1H), 2.38 (s, 3H), 2.27 (s, 3H), 2.23 (s, 3H).

**1 d** <sup>1</sup>H NMR (600 MHz, DMSO-*d*<sub>6</sub>) δ 9.10 (s, 1H), 7.93 (d, *J* = 8.1 Hz, 2H), 7.84 (d, *J* = 8.3 Hz, 2H), 7.46 (d, *J* = 8.1 Hz, 2H), 7.39 (d, *J* = 8.0 Hz, 2H), 2.41 (s, 3H), 2.40 (s, 3H).

**1 e** <sup>1</sup>H NMR (400 MHz, DMSO-*d*<sub>6</sub>) δ 9.26 (s, 1H), 8.68 (s, 1H), 8.08 (d, *J* = 8.1 Hz, 1H), 8.04 – 7.96 (m, 3H), 7.89 (d, *J* = 8.2 Hz, 2H), 7.73 – 7.67 (m, 1H), 7.66 – 7.60 (m, 1H), 7.46 (d, *J* = 8.1 Hz, 2H), 2.39 (s, 3H).

**1 f**  $^1\text{H}$  NMR (400 MHz, DMSO- $d_6$ )  $\delta$  9.14 (s, 1H), 7.81 (dd,  $J = 12.3, 7.9$  Hz, 3H), 7.63 – 7.53 (m, 2H), 7.48 – 7.38 (m, 4H), 7.34 (dd,  $J = 7.9, 2.6$  Hz, 1H), 7.18 (t,  $J = 7.4$  Hz, 1H), 7.08 – 7.01 (m, 2H), 2.38 (s, 3H).

**2 a**  $^1\text{H}$  NMR (600 MHz, DMSO- $d_6$ )  $\delta$  9.21 (d,  $J = 9.3$  Hz, 1H), 7.75 (d,  $J = 8.1$  Hz, 2H), 7.40 (dd,  $J = 12.4, 7.6$  Hz, 6H), 5.83 (d,  $J = 9.2$  Hz, 1H), 2.40 (s, 3H).

**2 b**  $^1\text{H}$  NMR (400 MHz, Chloroform- $d$ )  $\delta$  7.77 (d,  $J = 8.2$  Hz, 2H), 7.32 (d,  $J = 8.0$  Hz, 2H), 6.83 (s, 2H), 5.68 (d,  $J = 6.1$  Hz, 1H), 5.22 (d,  $J = 6.2$  Hz, 1H), 2.44 (s, 3H), 2.33 (s, 6H), 2.24 (s, 3H).

**2 c**  $^1\text{H}$  NMR (400 MHz, DMSO- $d_6$ )  $\delta$  9.12 (d,  $J = 8.2$  Hz, 1H), 7.73 (d,  $J = 8.1$  Hz, 2H), 7.39 (d,  $J = 8.0$  Hz, 2H), 7.14 (d,  $J = 7.7$  Hz, 1H), 7.08 (dd,  $J = 7.8, 2.0$  Hz, 1H), 7.04 (d,  $J = 2.0$  Hz, 1H), 5.69 (d,  $J = 7.6$  Hz, 1H), 2.39 (s, 3H), 2.19 (s, 3H), 2.17 (s, 3H).

**2 d**  $^1\text{H}$  NMR (400 MHz, Chloroform- $d$ )  $\delta$  7.86 – 7.77 (m, 2H), 7.36 (d,  $J = 8.0$  Hz, 2H), 7.31 (d,  $J = 7.8$  Hz, 2H), 7.20 (d,  $J = 7.8$  Hz, 2H), 5.43 (d,  $J = 8.9$  Hz, 1H), 5.13 (d,  $J = 8.9$  Hz, 1H), 2.46 (s, 3H), 2.36 (s, 3H)..

**2 e**  $^1\text{H}$  NMR (400 MHz, DMSO- $d_6$ )  $\delta$  9.31 (d,  $J = 9.1$  Hz, 1H), 7.98 – 7.87 (m, 4H), 7.77 (d,  $J = 8.1$  Hz, 2H), 7.57 (dd,  $J = 6.3, 3.2$  Hz, 2H), 7.46 (dd,  $J = 8.6, 1.9$  Hz, 1H), 7.38 (d,  $J = 8.0$  Hz, 2H), 6.02 (d,  $J = 9.1$  Hz, 1H), 2.36 (s, 3H).

**2 f**  $^1\text{H}$  NMR (400 MHz, Chloroform- $d$ )  $\delta$  7.77 (d,  $J = 8.3$  Hz, 2H), 7.33 (ddd,  $J = 12.0, 8.3, 5.8$  Hz, 5H), 7.15 (ddd,  $J = 7.3, 4.2, 2.8$  Hz, 2H), 7.04 (t,  $J = 2.1$  Hz, 1H), 7.01 – 6.94 (m, 3H), 5.69 (d,  $J = 9.1$  Hz, 1H), 5.40 (d,  $J = 9.1$  Hz, 1H), 2.43 (s, 3H).

### 3. $^{13}\text{C}$ NMR spectra of six imine substrates and six products

**1 a**  $^{13}\text{C}$  NMR (151 MHz, DMSO- $d_6$ )  $\delta$  171.96, 145.05, 135.28, 131.68, 130.51(2C), 129.72(2C), 128.10(2C), 126.05(2C), 21.54.

**1 b**  $^{13}\text{C}$  NMR (101 MHz, DMSO- $d_6$ )  $\delta$  169.51, 144.38, 144.28, 142.19, 135.27, 130.37(2C), 129.95(2C), 127.51(2C), 125.70, 21.02(4C)

**1 c**  $^{13}\text{C}$  NMR (101 MHz, DMSO- $d_6$ )  $\delta$  171.12, 145.22, 144.38, 137.61, 135.11, 131.40, 130.34, 129.98(2C), 129.87, 129.51, 127.54(2C), 21.04, 19.84, 19.05.

**1 d**  $^{13}\text{C}$  NMR (151 MHz, DMSO- $d_6$ )  $\delta$  171.54, 146.71, 144.87, 135.54, 131.76(2C), 130.45(2C), 130.36(2C), 130.05, 128.01(2C), 21.90, 21.50

**1 e**  $^{13}\text{C}$  NMR (101 MHz, DMSO- $d_6$ )  $\delta$  171.13 , 144.57 , 136.53 , 135.95 , 132.22 , 130.06 (2C), 129.76 , 129.63 , 129.56 , 129.05 , 127.96 , 127.71(2C) , 127.37 , 123.62 , 21.07.

**1 f**  $^{13}\text{C}$  NMR (101 MHz, Chloroform- $d$ )  $\delta$  171.03, 157.42, 155.78, 144.66, 134.59, 133.98, 131.05, 130.23(2C), 130.05(2C), 127.70(2C), 126.39, 125.05, 124.18, 119.45, 119.13(2C), 21.07.

**2 a**  $^{13}\text{C}$  NMR (151 MHz, DMSO- $d_6$ )  $\delta$  143.79, 137.65, 134.35, 130.13(2C), 129.44, 129.35(2C), 127.41(2C), 127.17(2C), 118.17, 47.52, 21.46.

**2 b**  $^{13}\text{C}$  NMR (101 MHz, Chloroform- $d$ )  $\delta$  144.64, 140.00, 136.74, 136.13, 130.55(2C), 130.03(2C), 127.46(2C), 126.25, 116.79, 42.82, 21.76, 21.01, 20.15(4C).

**2 c**  $^{13}\text{C}$  NMR (101 MHz, DMSO- $d_6$ )  $\delta$  143.25, 137.31, 137.25, 136.77, 131.11, 129.81, 129.60(2C), 127.99, 126.74(2C), 124.37, 117.86, 46.86, 21.01, 19.32, 19.03.

**2 d**  $^{13}\text{C}$  NMR (101 MHz, Chloroform- $d$ )  $\delta$  144.71, 140.12, 136.20, 130.12(4C), 129.30, 127.48, 127.41, 127.11(2C), 116.60, 48.10, 21.76, 21.27.

**2 e**  $^{13}\text{C}$  NMR (101 MHz, DMSO- $d_6$ )  $\delta$  143.36, 137.21, 132.72, 132.35, 131.19, 129.66(2C), 128.83, 128.03, 127.60, 127.01, 126.89, 126.76(2C), 126.02, 124.46, 117.66, 47.29, 20.98.

**2 f**  $^{13}\text{C}$  NMR (101 MHz, Chloroform- $d$ )  $\delta$  158.34 , 156.30 , 144.81 , 136.05 , 134.11 , 130.87 , 130.16(2C) , 130.09(2C) , 127.40 (2C), 124.17 , 121.58 , 119.74 , 119.37(2C) , 117.31 , 116.29 , 48.02 , 21.75.

Fig. S1  $^1\text{H}$  NMR spectrum of substrate **1a**: 4-methyl-*N*-phenylmethylene-benzenesulfonamide

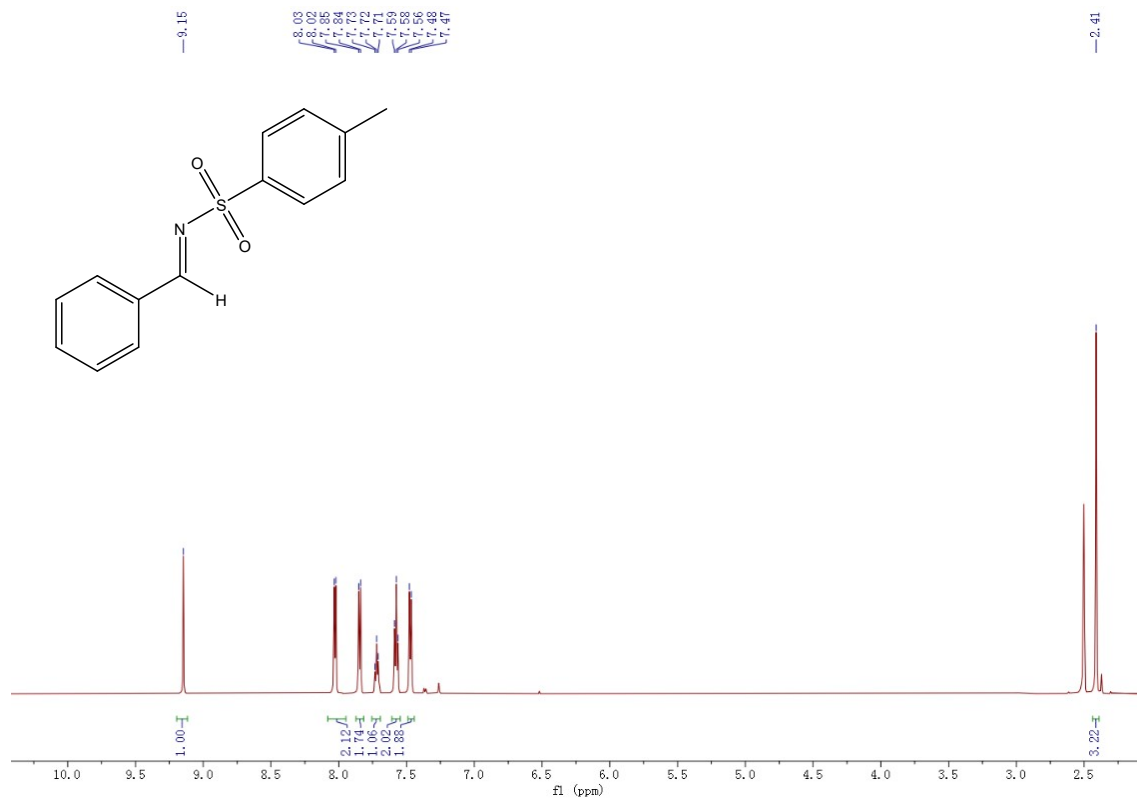

Fig. S2  $^1\text{H}$  NMR spectrum of substrate **1b**: 4-methyl-*N*-[(2,4,6-trimethylphenyl)methylene]-Benzenesulfonamide

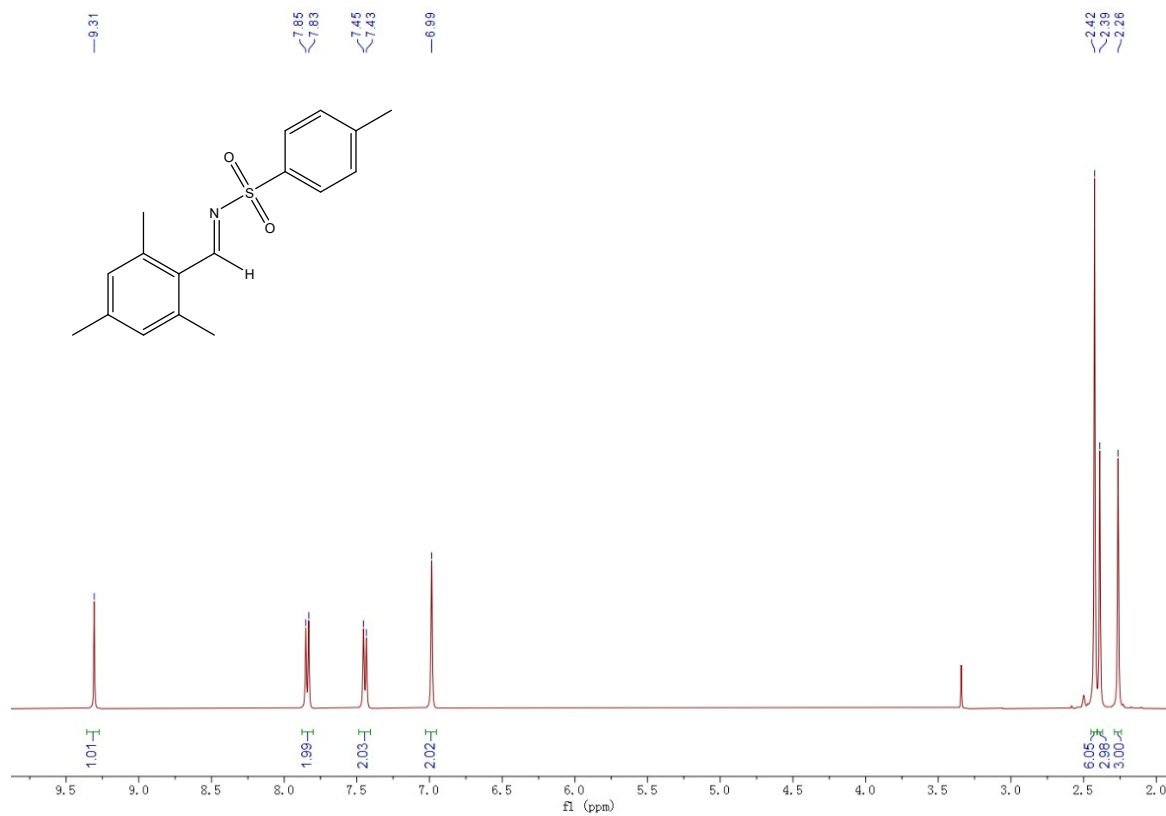

Fig. S3  $^1\text{H}$  NMR spectrum of substrate **1c**: 4-methyl-*N*-[(3,4-dimethylphenyl)methylene]-Benzenesulfonamide

Benzenesulfonamide

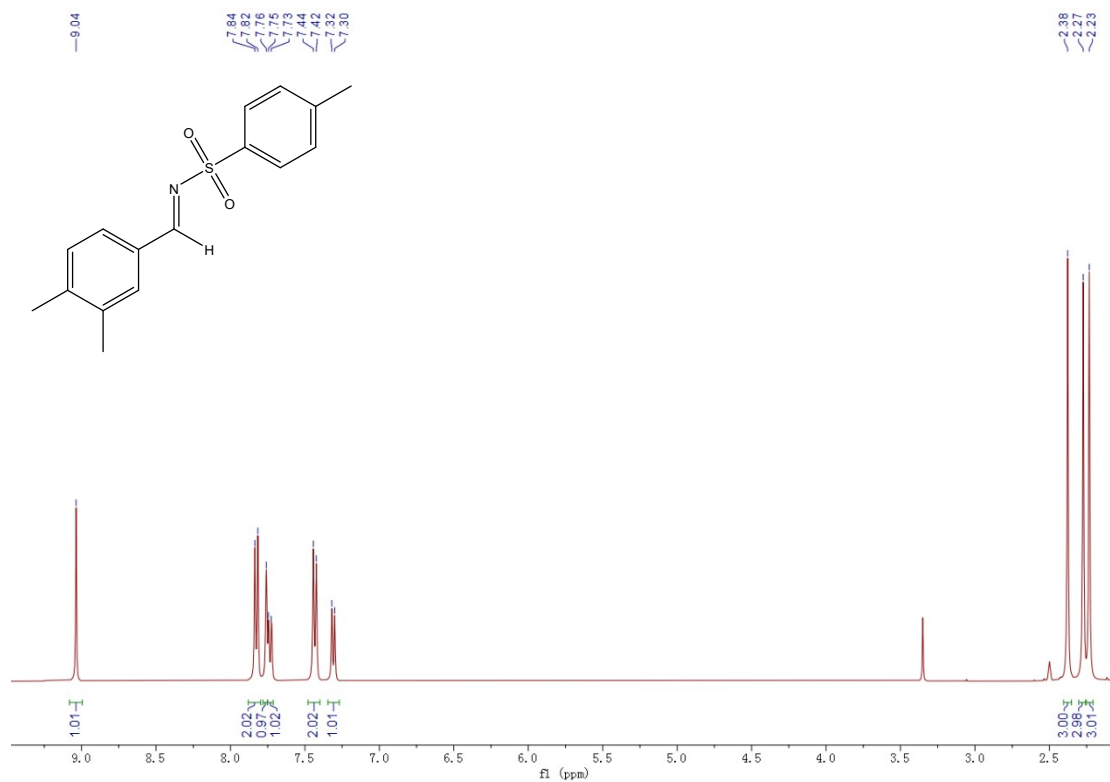

Fig. S4 <sup>1</sup>H NMR spectrum of substrate **1d**: 4-methyl-N-[(4-methylphenyl)methylene]-

Benzenesulfonamide

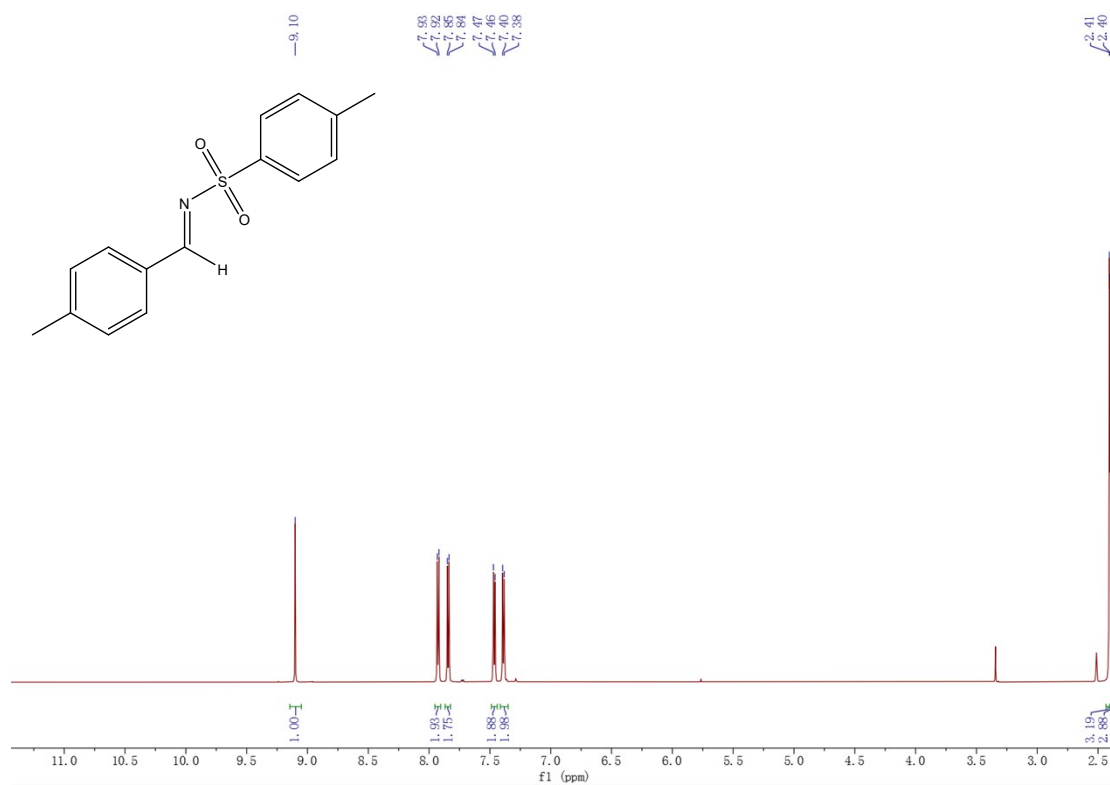

Fig. S5 <sup>1</sup>H NMR spectrum of substrate **1e**: 4-methyl-*N*-(2-naphthalenylmethylene)-benzenesulfonamide

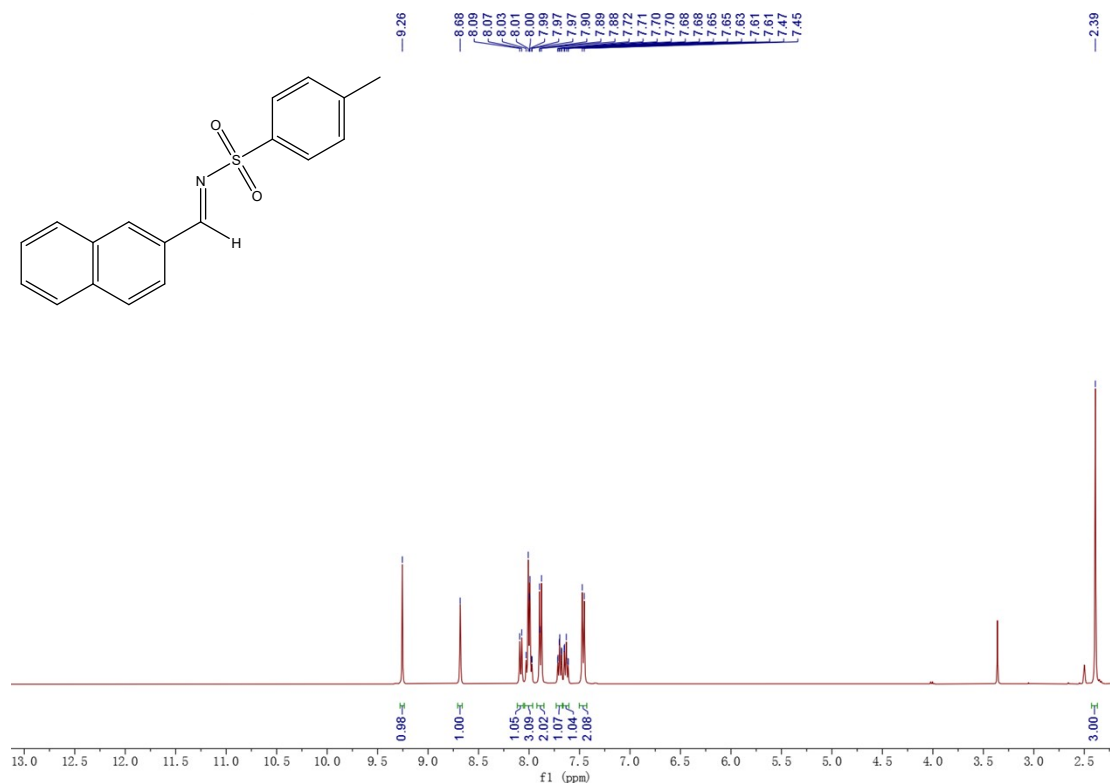

Fig. S6 <sup>1</sup>H NMR spectrum of substrate **1f**: 4-methyl-*N*-[(3-phenoxyphenyl)methylene]-benzenesulfonamide

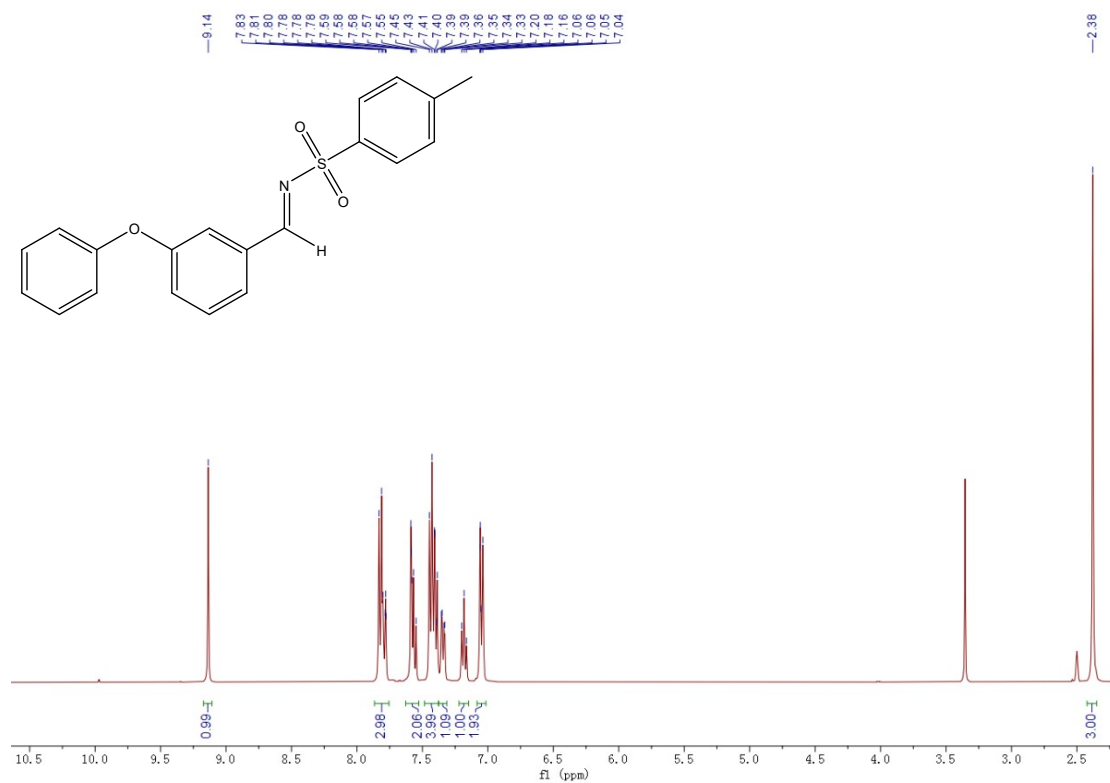



Fig. S7  $^1\text{H}$  NMR spectrum of substrate **2a**: *N*-[cyano(phenyl)methyl]-4-methylbenzenesulfonamide

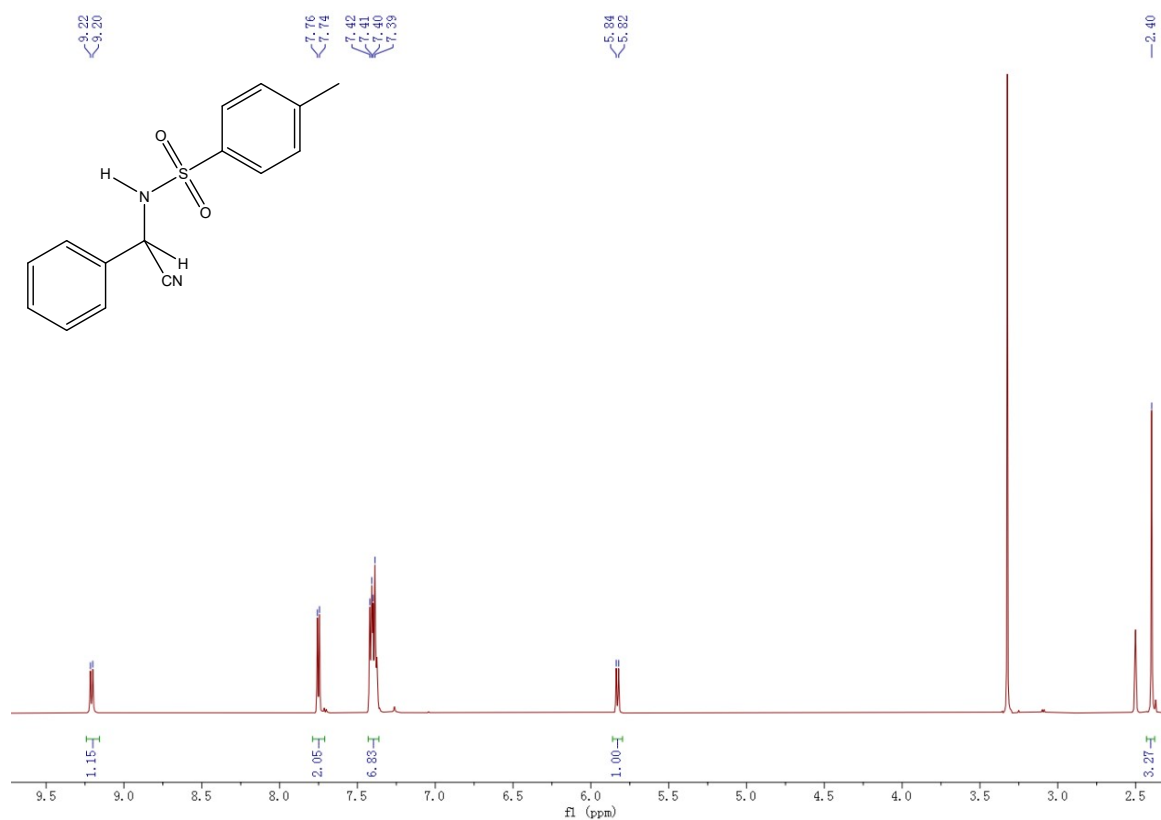

Fig. S8  $^1\text{H}$  NMR spectrum of substrate **2b**: *N*-[cyano(2,4,6-trimethylphenyl)methyl]-4-methylbenzenesulfonamide

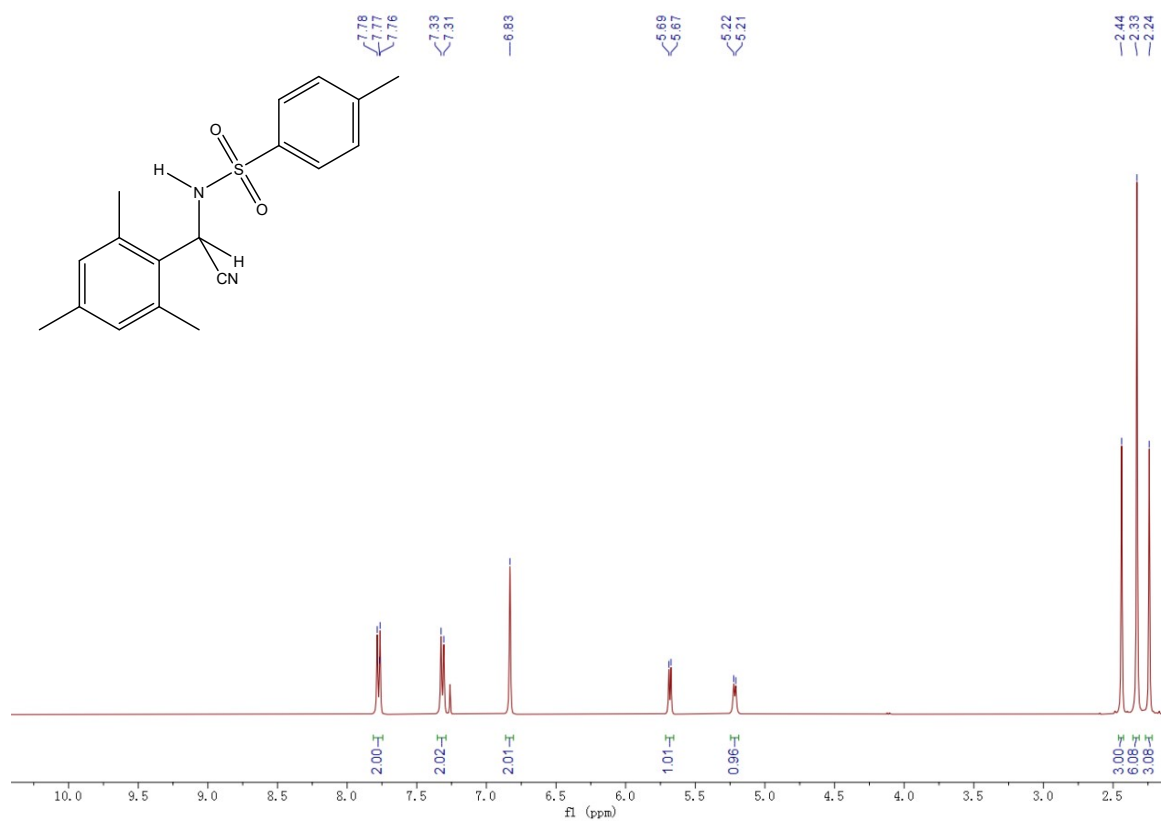

Fig. S9  $^1\text{H}$  NMR spectrum of substrate **2c**: *N*-[cyano(3,4-dimethylphenyl)methyl]-4-methylbenzenesulfonamid

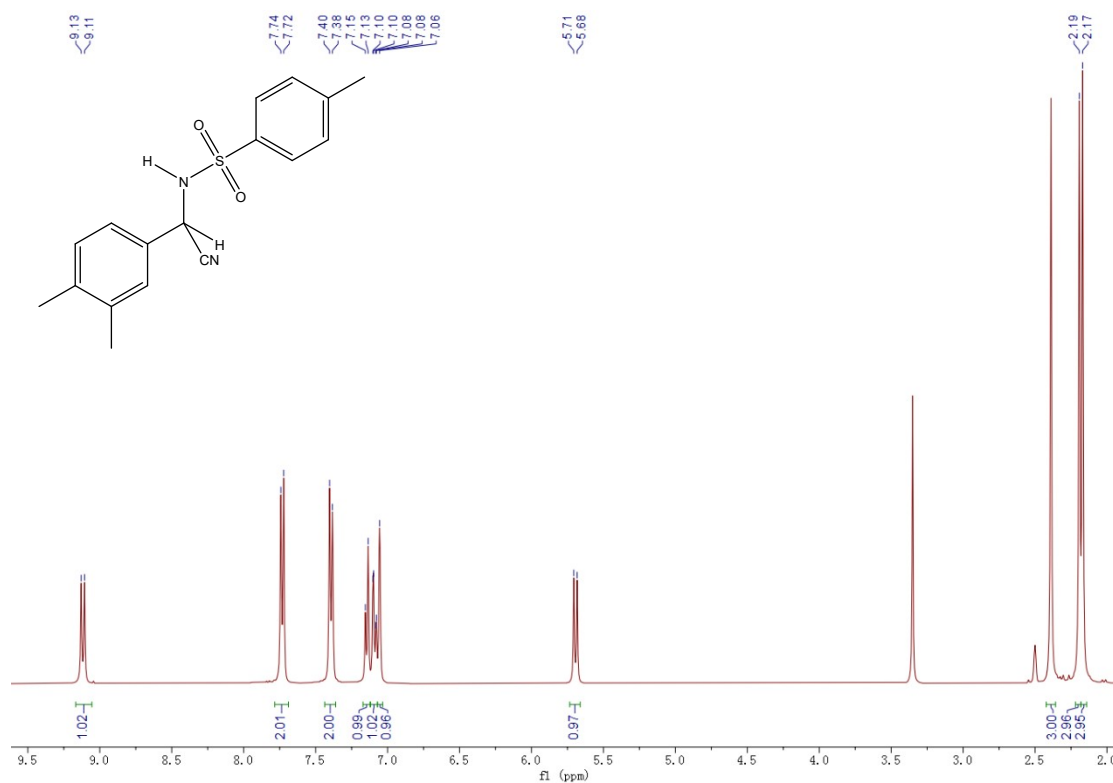

Fig. S10  $^1\text{H}$  NMR spectrum of substrate **2d**: *N*-[cyano(*p*-tolyl)methyl]-4-methylbenzenesulfonamide

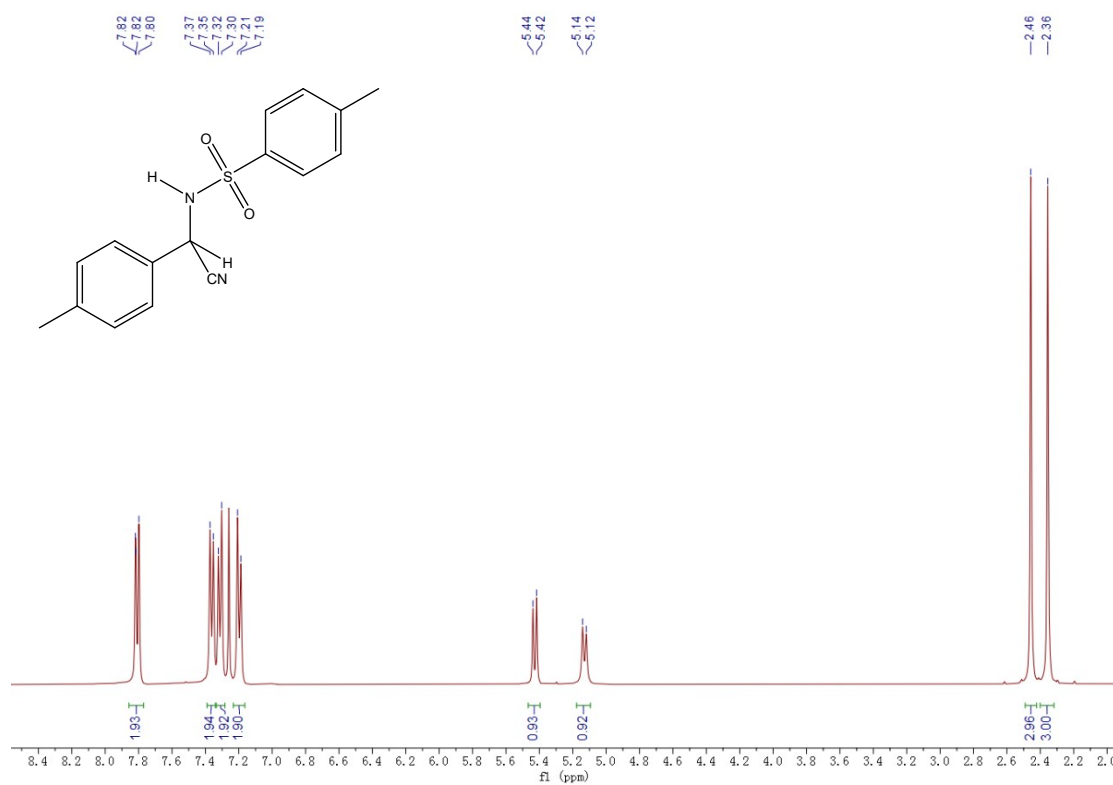

Fig. S11 <sup>1</sup>H NMR spectrum of substrate **2e**: *N*-(cyano-2-naphthalenylmethyl)-4-methylbenzenesulfonamide

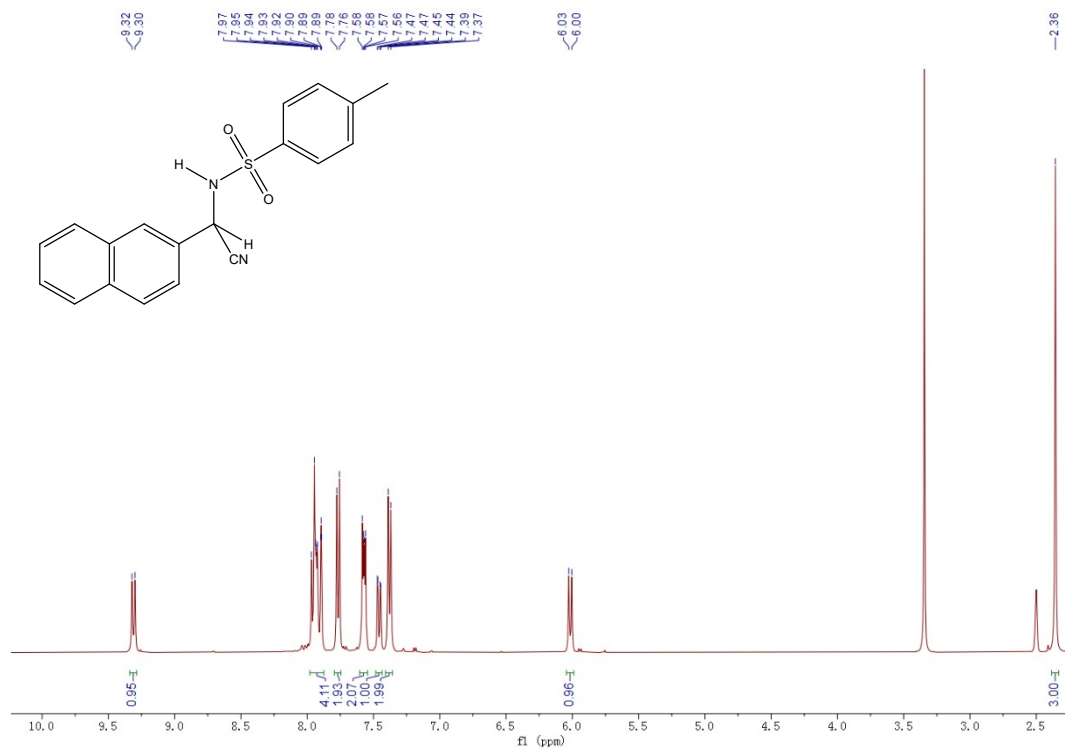

Fig. S12 <sup>1</sup>H NMR spectrum of substrate **2f**: *N*-{cyano[(3-phenoxyphenyl)methylene]methyl}-4-methylbenzenesulfonamide

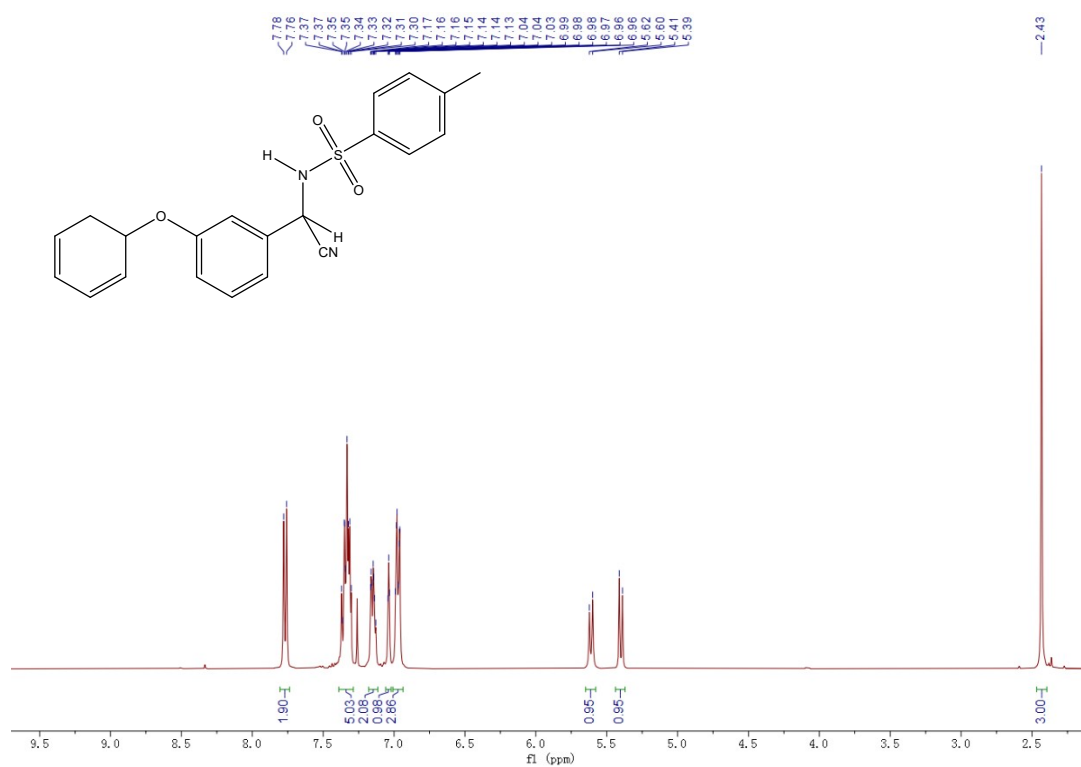

Fig. S13  $^{13}\text{C}$  NMR spectrum of substrate **1a**: 4-methyl-*N*-phenylmethylene-benzenesulfonamide

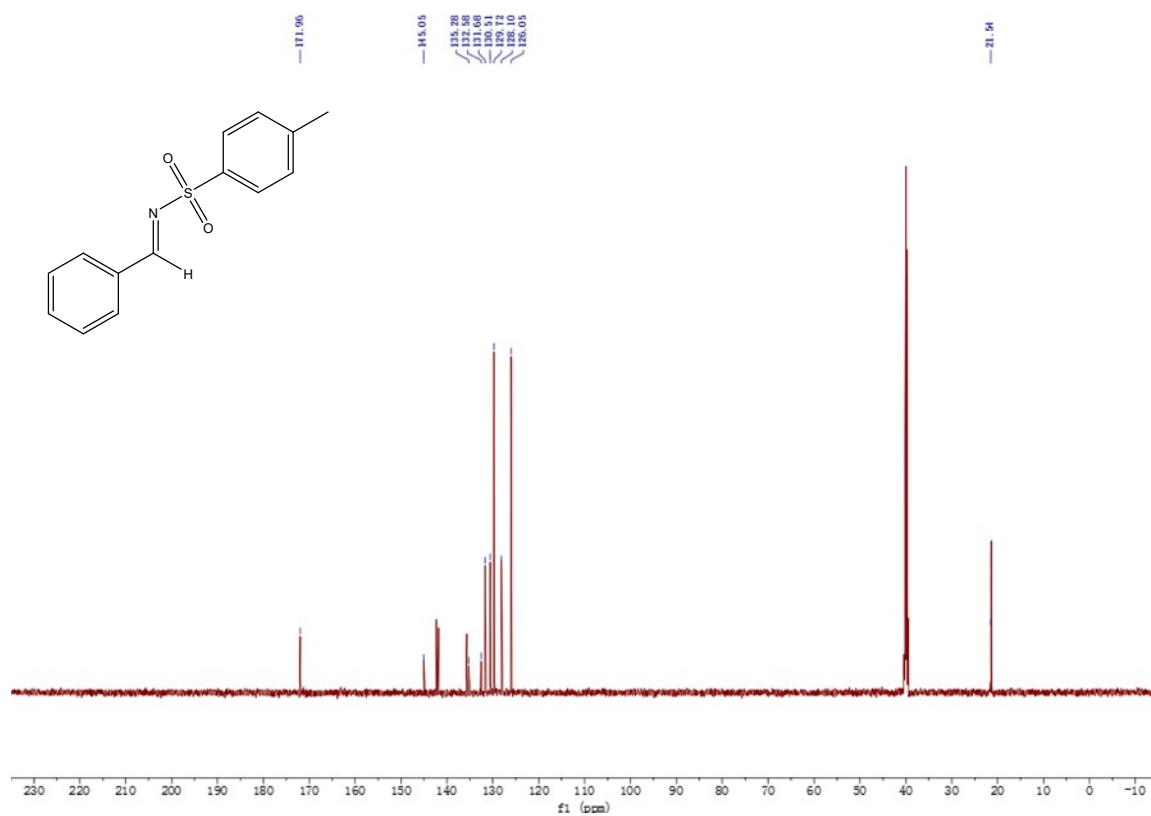

Fig. S14  $^{13}\text{C}$  NMR spectrum of substrate **1b**: 4-methyl-*N*-[(2,4,6-trimethylphenyl)methylene]-Benzenesulfonamide

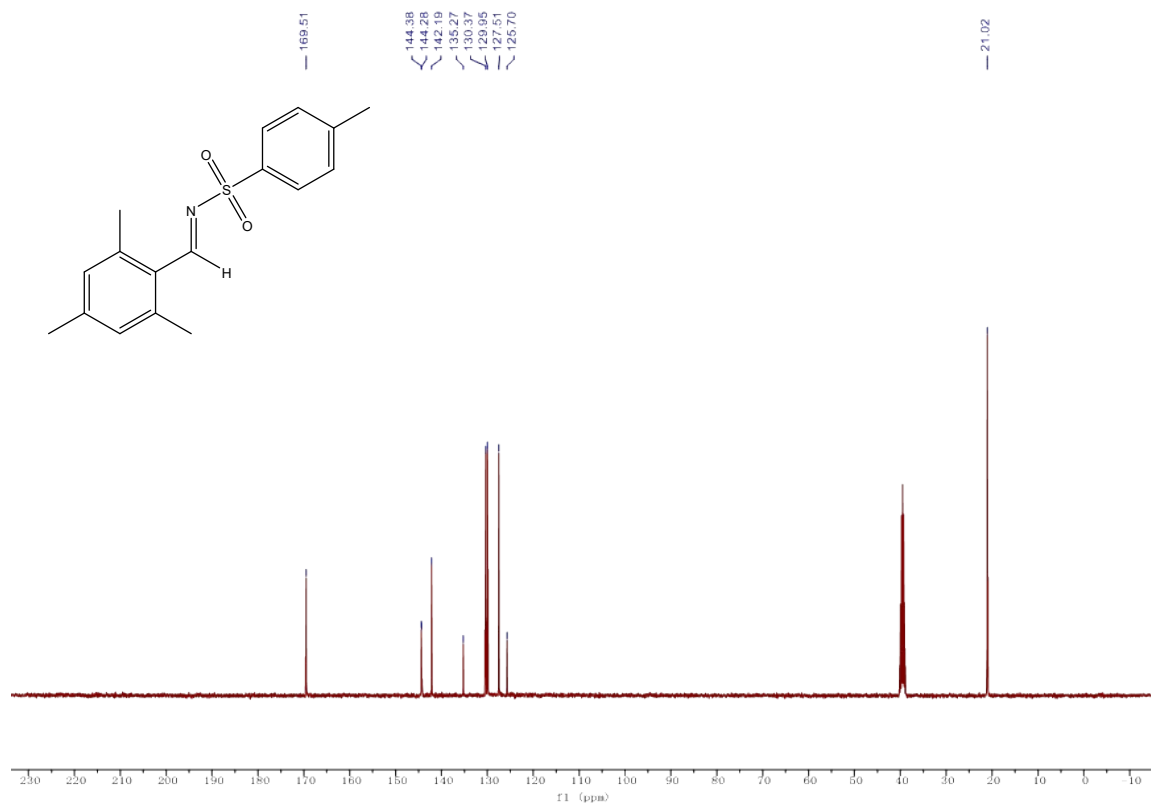

Fig. S15  $^{13}\text{C}$  NMR spectrum of substrate **1c**: 4-methyl-*N*-[(3,4-dimethylphenyl)methylene]-Benzenesulfonamide

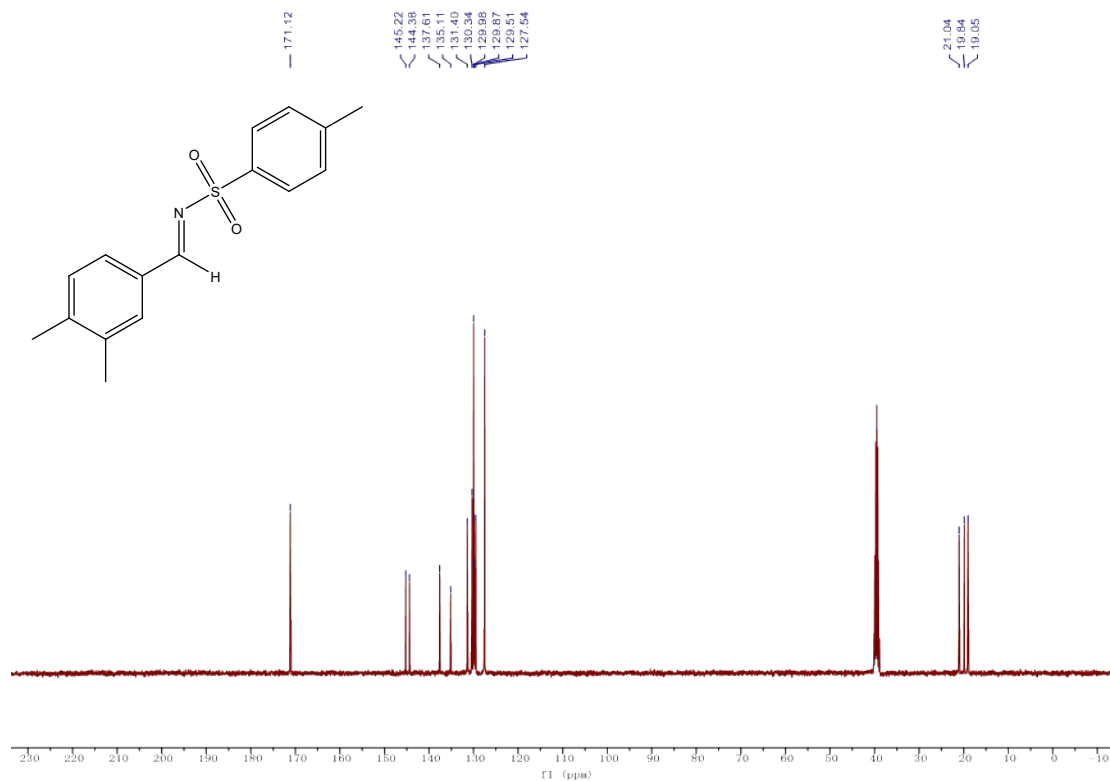

Fig. S16  $^{13}\text{C}$  NMR spectrum of substrate **1d**: 4-methyl-*N*-[(4-methylphenyl)methylene]-Benzenesulfonamide

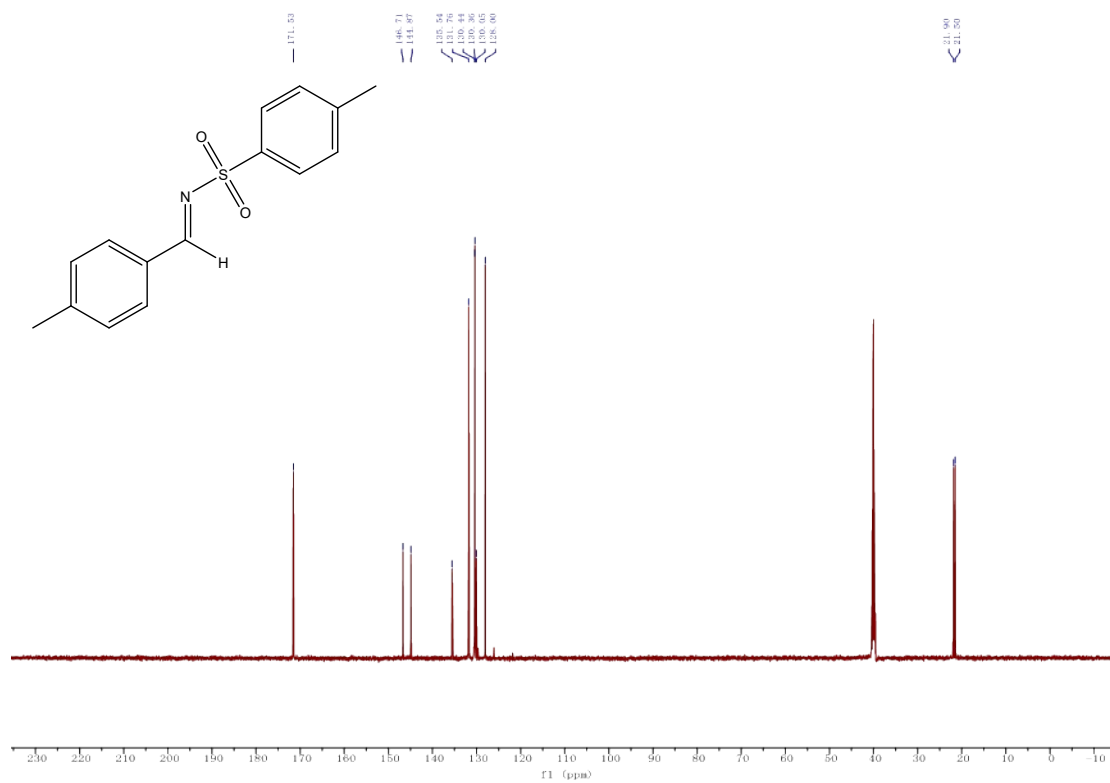

Fig. S17  $^{13}\text{C}$  NMR spectrum of substrate **1e**: 4-methyl-*N*-(2-naphthalenylmethylene)-benzenesulfonamide

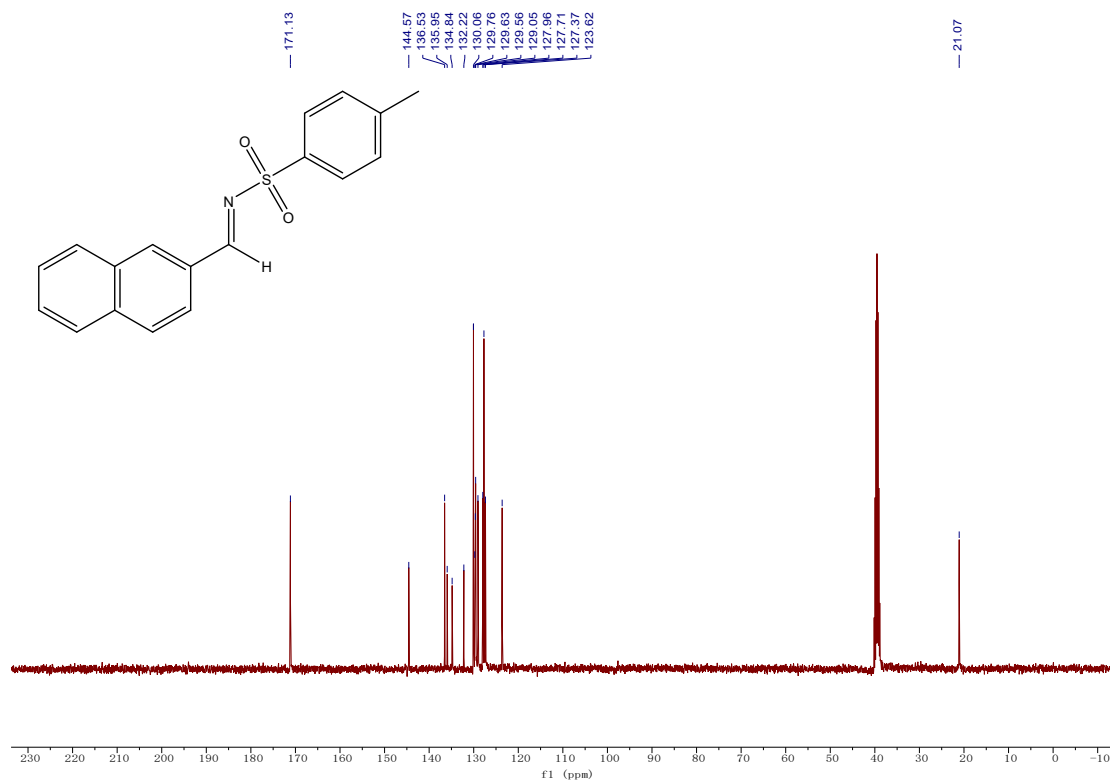

Fig. S18  $^{13}\text{C}$  NMR spectrum of substrate **1f**: 4-methyl-*N*-[(3-phenoxyphenyl)methylene]-benzenesulfonamide

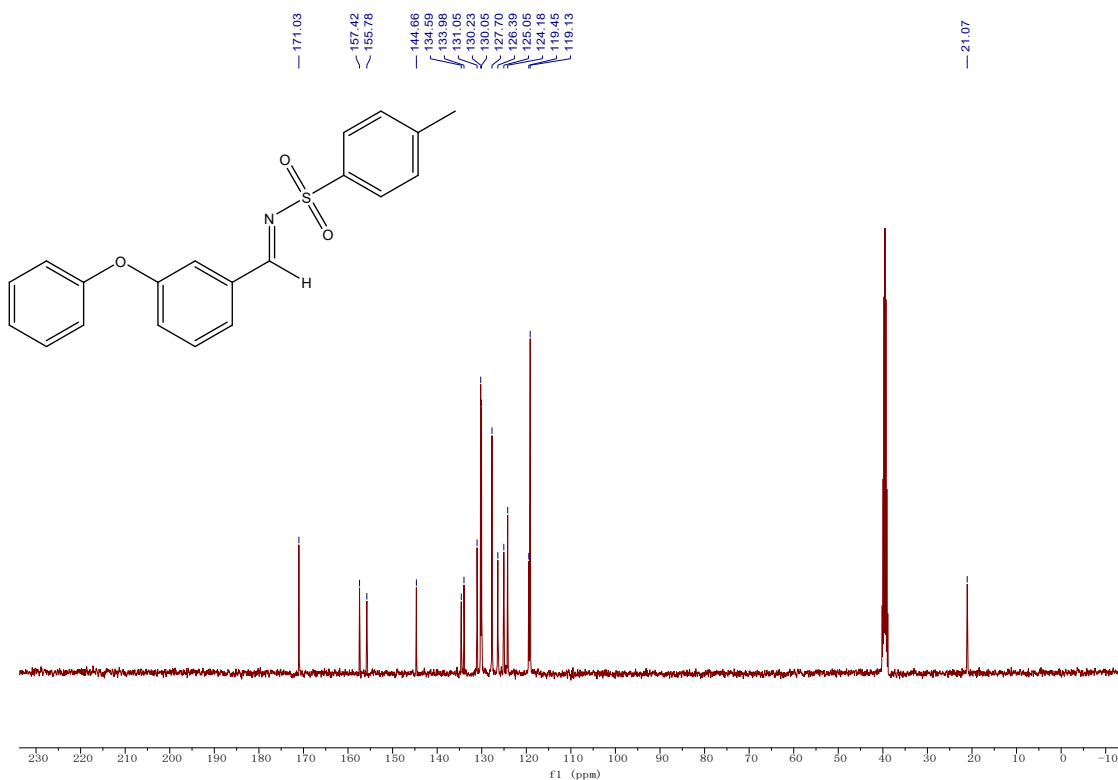

Fig. S19  $^{13}\text{C}$  NMR spectrum of substrate **2a**: *N*-[cyano(phenyl)methyl]-4-methylbenzenesulfonamide

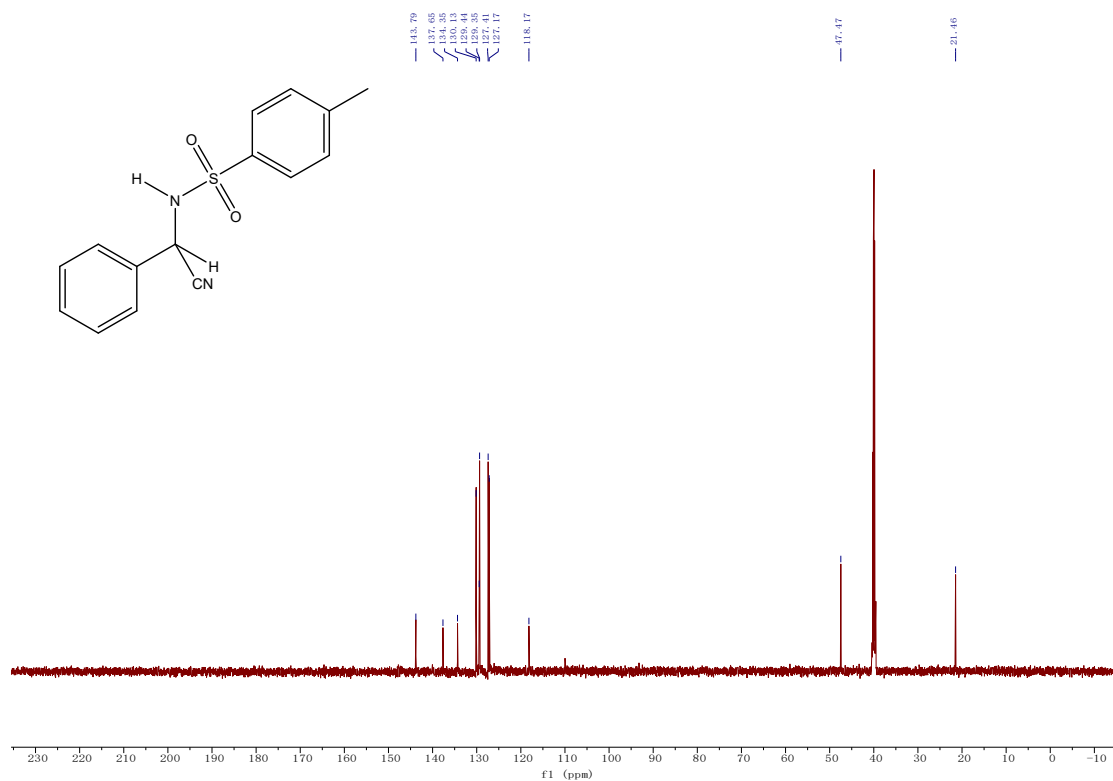

Fig. S20  $^{13}\text{C}$  NMR spectrum of substrate **2b**: *N*-[cyano(2,4,6-trimethylphenyl)methyl]-4-methylbenzenesulfonamide

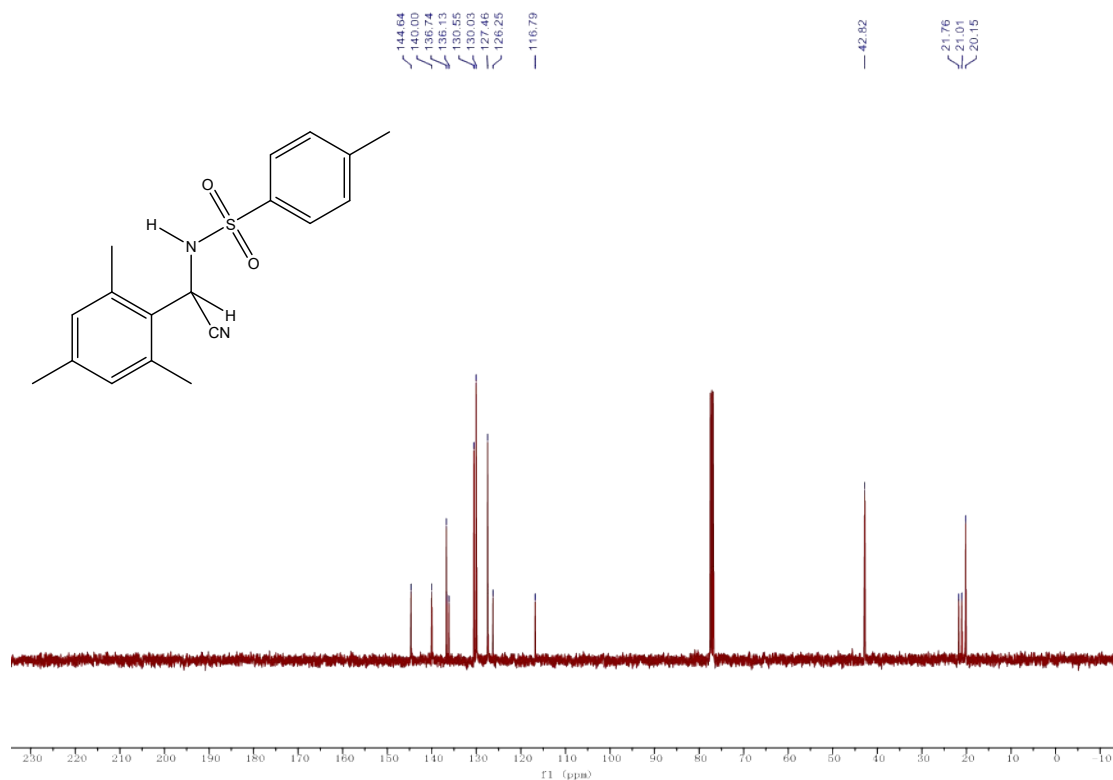

Fig. S21  $^{13}\text{C}$  NMR spectrum of substrate **2c**: *N*-[cyano(3,4-dimethylphenyl)methyl]-4-methylbenzenesulfonamid

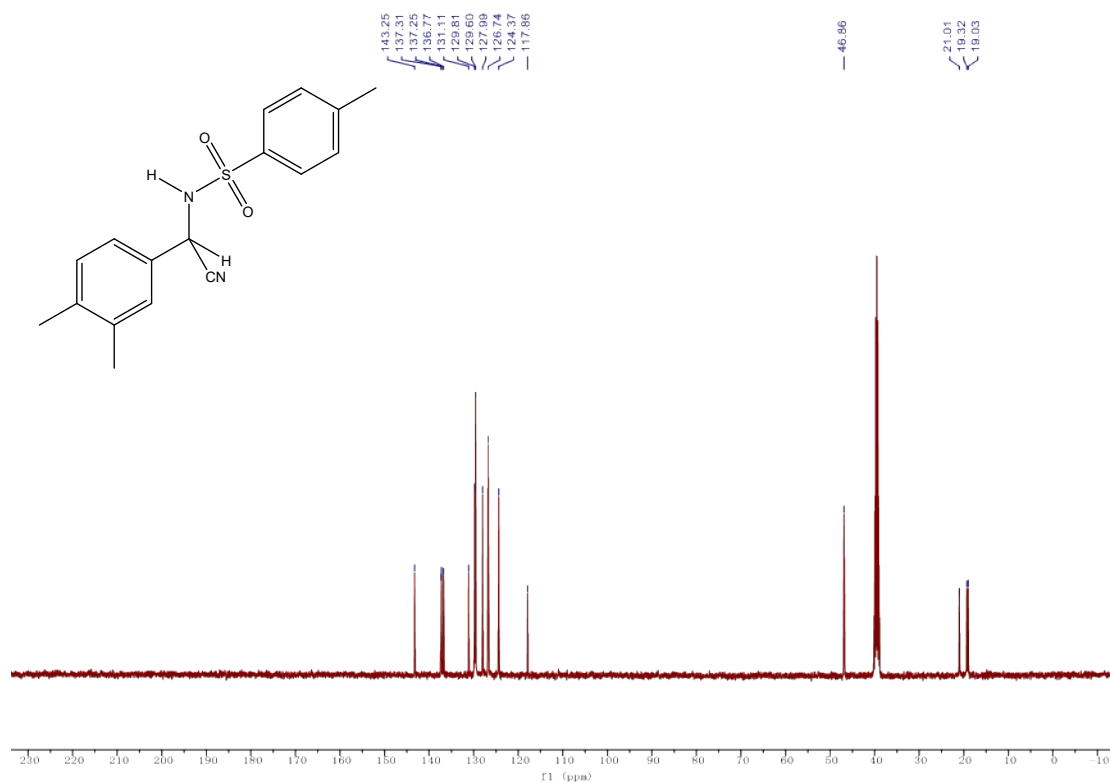

Fig. S22  $^{13}\text{C}$  NMR spectrum of substrate **2d**: *N*-[cyano(*p*-tolyl)methyl]-4-methylbenzenesulfonamide

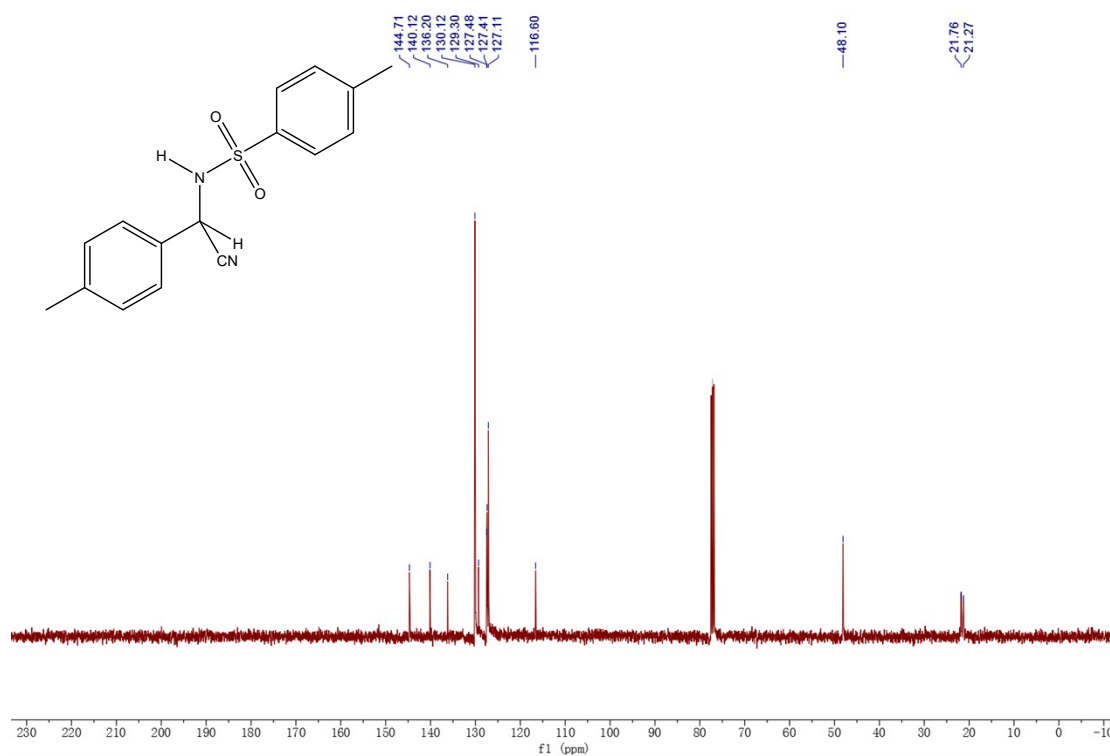



Fig. S23  $^{13}\text{C}$  NMR spectrum of substrate **2e**: *N*-(cyano-2-naphthalenylmethyl)-4-methylbenzenesulfonamide

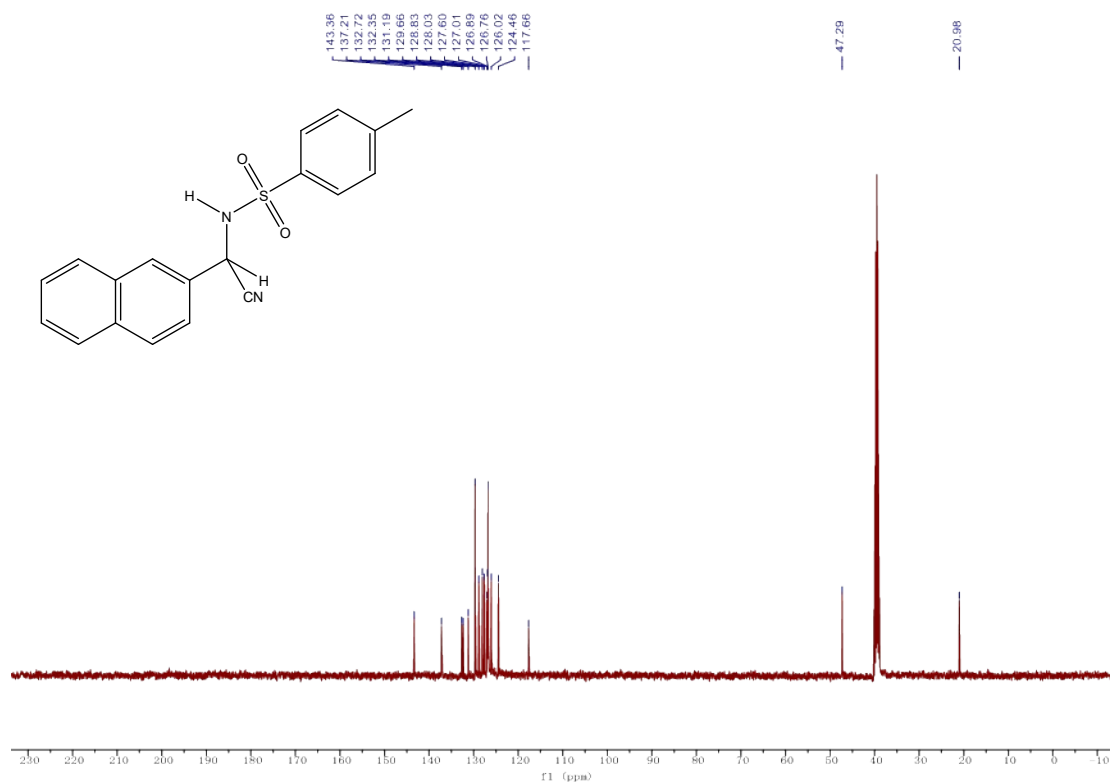

Fig. S24  $^{13}\text{C}$  NMR spectrum of substrate **2f**: *N*-{cyano[(3-phenoxyphenyl)methylene]methyl}-4-methylbenzenesulfonamide

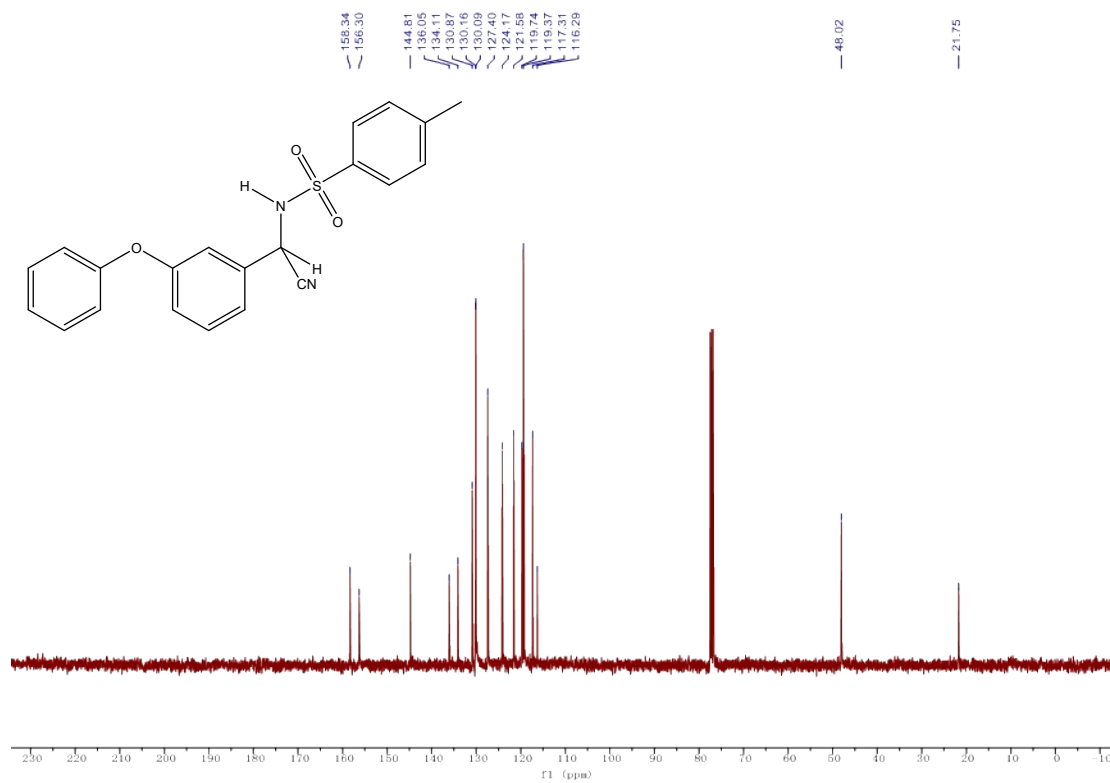

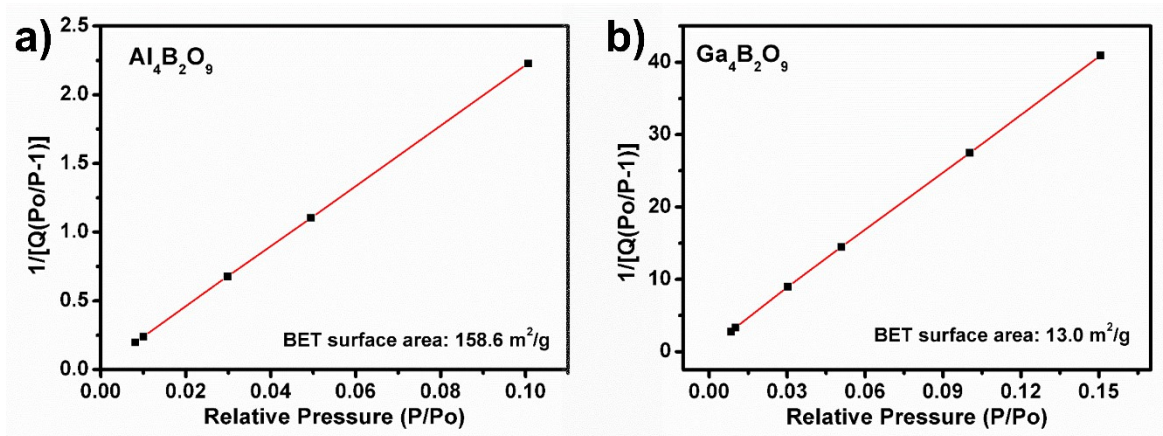

Fig. S25 BET surface areas of a)  $\text{Al}_4\text{B}_2\text{O}_9$  and b)  $\text{Ga}_4\text{B}_2\text{O}_9$ .
